# Supplementary material
Source: publisher site journal article supplement (https://static.cambridge.org/content/id/urn:cambridge.org:id:article:S0962728600008873/resource/name/Maschat_et_al,_Appendix_Figure4.pdf)
Supplement: Supplementary file 1 [file Maschat_et_al,_Appendix_Figure4.pdf]

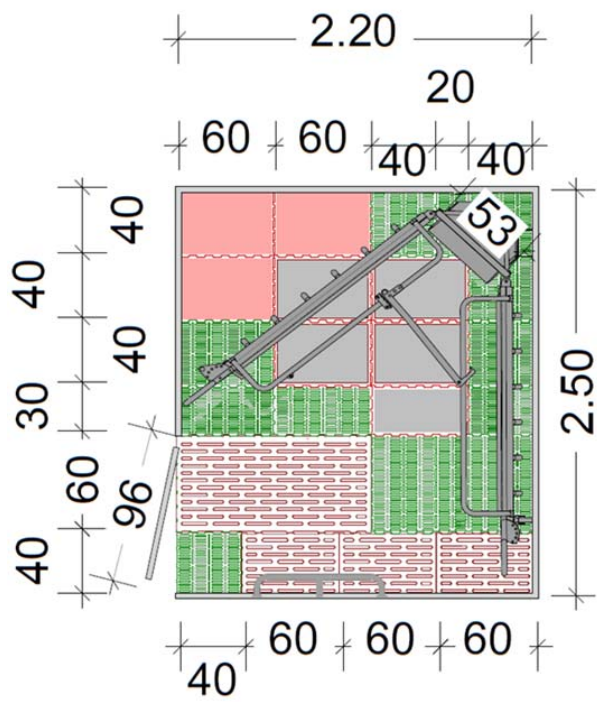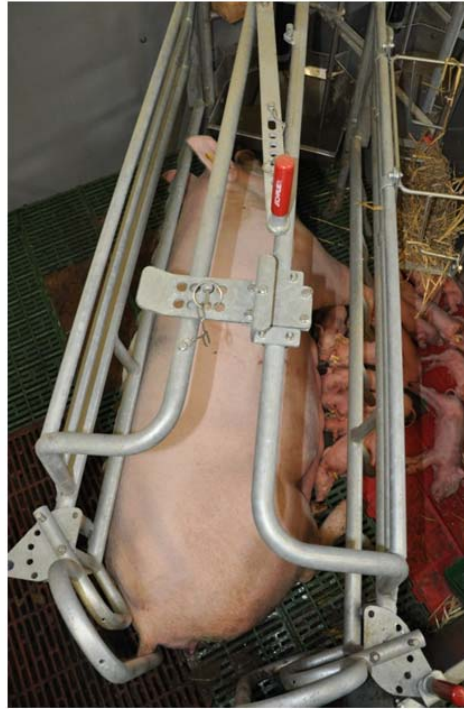

Figure 4: Trapez pen (Schauer Agrotrotronic GmbH, Prambachkirchen, Austria): plan of pen with open crate and photograph of sow in closed crate. Crate equipped with a wheel and a lever mechanism for adjustment in width and opening of the crate, flexible wings attached to the rear end for length adjustment. Lowest bars (distance to floor: 0.40 m) equipped with wave-shaped, diagonal pins directing towards the outside of the crate. Flooring: solid plastic floor (red, creep area), plastic slatted floor (green), cast iron slatted floor (white with red slats) and solid concrete floor (grey). Farrowing rail mounted to side wall of the pen.
